# Supplementary material
Source: PubMed Central journal article supplement (PMC1435444)
Supplement: pbio.0040099.sd006.pdf [file pbio.0040099.sd006.pdf]

## Text S6. Calculation of Electrostatic Contribution to Catalysis.

The slope of the dependence of phenolate affinity on  $pK_a$  (Figure 10) can be used to calculate the total electrostatic contribution to catalysis, which equals  $10^{\text{slope} * (pK_a^{TS} - pK_a^{GS})}$ . The maximal  $pK_a$  difference between the ground state and the transition state is 16. The average slope (based on all four correlations above) was  $0.05 \pm 0.10$ , giving a maximum slope of 0.15, which would translate into a 250-fold rate enhancement. Similarly, the minimum slope of -0.05 would translate into a 6-fold barrier to catalysis. Also, the phenolates probed in Figure 10 spanned only  $\sim 2$   $pK_a$  units, so any nonlinearity over the larger  $pK_a$  difference between the ground state and transition state could lead to larger or smaller effects, although there was no indication of a significant change in slope over the extended  $pK_a$  range investigated with the *ortho*-F substituted phenolates (Figure S3).
