# Supplementary material
Source: PubMed Central journal article supplement (PMC1435444)

Figure S1

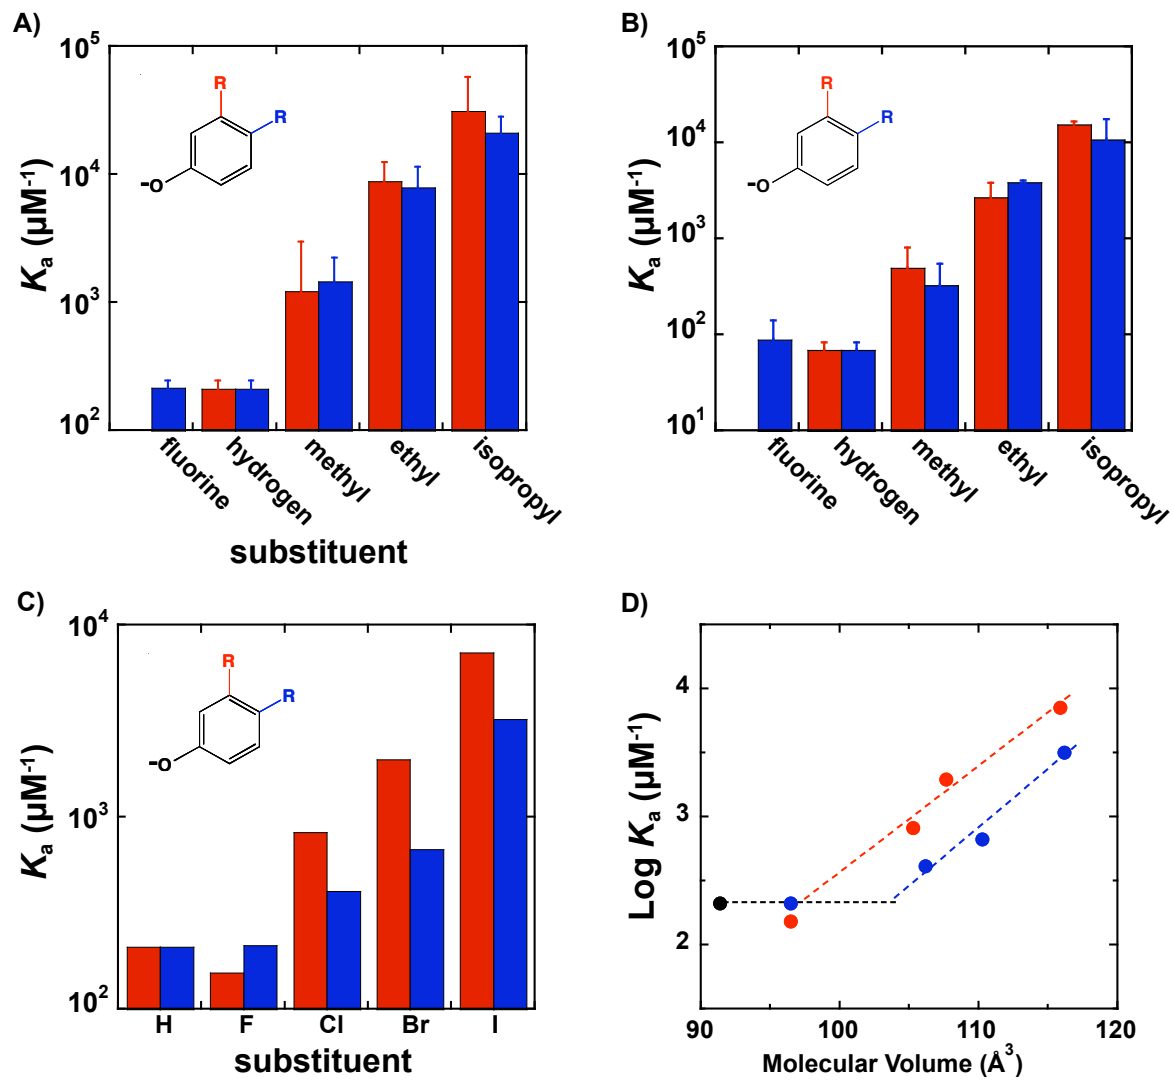

Supplement: pbio.0040099.sg001.pdf [file pbio.0040099.sg001.pdf]

Figure S2.

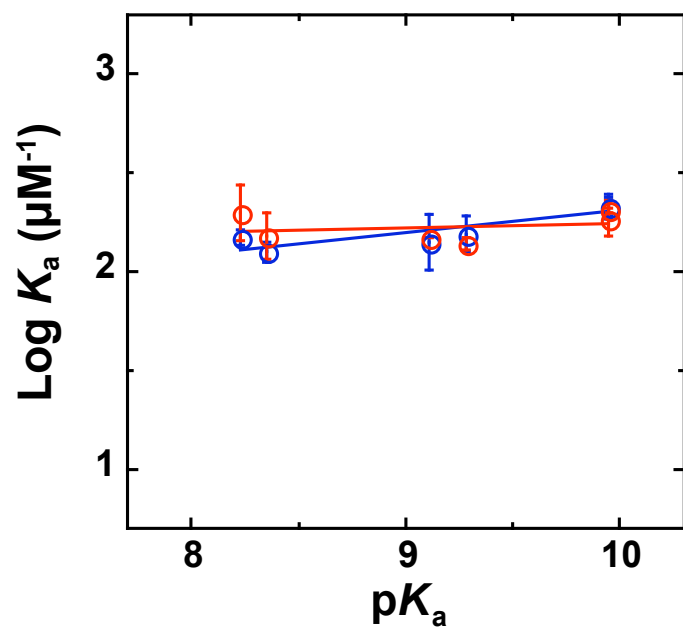

Supplement: pbio.0040099.sg002.pdf [file pbio.0040099.sg002.pdf]
